# Supplementary material for: Characteristics of astigmatism before and 1 month after blepharoptosis surgery in patients with acquired ptosis
Source: PubMed Central journal article supplement (PMC8553058; doi:10.1371/journal.pone.0258688), 2021-10-28
Supplement: pone.0258688.s002.pdf [file pone.0258688.s002.pdf]

| AP |     |     |     |     | Keratometric |         |       |         |      |
|----|-----|-----|-----|-----|--------------|---------|-------|---------|------|
| No | sex | R/L | age |     | Ks           | Ks Axis | Kf    | Kf Axis | MRD  |
| 1  | F   | R   | 63  | Pre | 44.73        | 86      | 44.07 | 176     | 2    |
| 2  |     | L   |     | Pre | 44.49        | 86      | 43.95 | 176     | 2.5  |
| 3  | F   | R   | 82  | Pre | 44.07        | 139     | 43.71 | 49      | 1    |
| 4  |     | L   |     | Pre | 43.99        | 172     | 43.40 | 82      | 1    |
| 5  | M   | L   | 68  | Pre | 45.88        | 174     | 45.12 | 84      | 0    |
| 6  | M   | R   | 87  | Pre | 45.56        | 146     | 44.48 | 56      | 0    |
| 7  |     | L   |     | Pre | 45.96        | 11      | 43.37 | 101     | 1    |
| 8  | F   | R   | 71  | Pre | 47.46        | 98      | 46.53 | 8       | 2    |
| 9  |     | L   |     | Pre | 47.15        | 96      | 46.60 | 6       | 2    |
| 10 | M   | L   | 79  | Pre | 46.95        | 62      | 45.55 | 152     | 1    |
| 11 | F   | R   | 85  | Pre | 47.27        | 7       | 45.35 | 97      | 0    |
| 12 |     | L   |     | Pre | 45.89        | 174     | 45.61 | 84      | 0    |
| 13 | F   | R   | 76  | Pre | 44.18        | 163     | 43.68 | 73      | 1    |
| 14 |     | L   |     | Pre | 45.02        | 35      | 43.92 | 125     | 1    |
| 15 | M   | R   | 71  | Pre | 45.61        | 96      | 45.10 | 6       | 0.5  |
| 16 |     | L   |     | Pre | 45.08        | 83      | 44.24 | 173     | 0.5  |
| 17 | F   | R   | 81  | Pre | 46.74        | 155     | 43.80 | 65      | 3    |
| 18 |     | L   |     | Pre | 43.91        | 145     | 43.76 | 55      | 2    |
| 19 | F   | R   | 71  | Pre | 43.98        | 91      | 42.81 | 1       | 0    |
| 20 |     | L   |     | Pre | 43.21        | 121     | 42.12 | 31      | 0.5  |
| 21 | F   | R   | 81  | Pre | 46.73        | 23      | 42.97 | 113     | 1    |
| 22 |     | L   |     | Pre | 43.64        | 8       | 43.15 | 98      | 0    |
| 23 | F   | R   | 77  | Pre | 45.98        | 121     | 44.81 | 31      | 0    |
| 24 |     | L   |     | Pre | 45.91        | 27      | 45.26 | 117     | 0    |
| 25 | F   | R   | 87  | Pre | 45.70        | 8       | 44.48 | 98      | 0    |
| 26 |     | L   |     | Pre | 46.18        | 14      | 44.37 | 104     | 0    |
| 27 | F   | R   | 70  | Pre | 45.67        | 38      | 45.37 | 128     | 0.5  |
| 28 |     | L   |     | Pre | 45.50        | 17      | 45.15 | 107     | 0.5  |
| 29 | F   | R   | 80  | Pre | 45.68        | 163     | 44.60 | 73      |      |
| 30 |     | L   |     | Pre | 45.53        | 170     | 45.27 | 80      | 0.5  |
| 31 | F   | R   | 68  | Pre | 44.27        | 113     | 43.87 | 23      | 1    |
| 32 |     | L   |     | Pre | 44.60        | 152     | 43.76 | 62      | 1    |
| 33 | M   | R   | 77  | Pre | 48.82        | 83      | 47.50 | 173     | 1    |
| 34 |     | L   |     | Pre | 48.63        | 118     | 47.50 | 28      | 0.5  |
| 35 | M   | R   | 67  | Pre | 45.96        | 149     | 45.39 | 59      | 0.5  |
| 36 |     | L   |     | Pre | 45.63        | 6       | 44.48 | 96      | 0    |
| 37 | F   | R   | 74  | Pre | 46.38        | 20      | 42.69 | 110     | 0    |
| 38 |     | L   |     | Pre | 43.60        | 163     | 42.10 | 73      | 0    |
| 39 | F   | R   | 55  | Pre | 44.15        | 84      | 43.37 | 174     | 0    |
| 40 |     | L   |     | Pre | 43.64        | 148     | 43.04 | 58      | 1    |
| 41 | F   | R   | 59  | Pre | 44.02        | 104     | 42.47 | 14      | 1    |
| 42 |     | L   |     | Pre | 44.78        | 84      | 43.34 | 174     | 1    |
| 43 | F   | R   | 81  | Pre | 45.60        | 163     | 44.55 | 73      | 0    |
| 44 |     | L   |     | Pre | 47.05        | 37      | 45.06 | 127     | 0    |
| 45 | F   | R   | 81  | Pre | 42.64        | 6       | 40.82 | 96      | -1   |
| 46 |     | L   |     | Pre | 44.04        | 11      | 41.04 | 101     | -1.5 |
| 47 | F   | R   | 79  | Pre | 46.31        | 10      | 45.92 | 100     | 1    |
| 48 |     | L   |     | Pre | 46.82        | 51      | 46.75 | 41      | 1    |

|    |   |   |    |     |       |     |       |     |     |
|----|---|---|----|-----|-------|-----|-------|-----|-----|
| 49 | F | R | 79 | Pre | 44.79 | 17  | 44.32 | 107 | 0.5 |
| 50 |   | L |    | Pre | 44.65 | 149 | 44.07 | 59  | -1  |
| 51 | M | R | 73 | Pre | 44.14 | 91  | 43.71 | 1   | 0   |
| 52 |   | L |    | Pre | 44.57 | 105 | 44.22 | 15  | 0.5 |
| 53 | F | R | 74 | Pre | 42.84 | 149 | 42.72 | 59  | 4   |
| 54 |   | L |    | Pre | 43.13 | 162 | 42.31 | 72  | 3.5 |
| 55 | F | R | 80 | Pre | 43.29 | 163 | 42.37 | 73  | 1   |
| 56 |   | L |    | Pre | 43.71 | 10  | 43.17 | 100 | 0.5 |
| 57 | F | R | 78 | Pre | 46.01 | 10  | 43.99 | 100 | 1.5 |
| 58 |   | L |    | Pre | 47.03 | 174 | 45.17 | 84  | 0.5 |
| 59 | F | R | 75 | Pre | 43.18 | 163 | 42.65 | 73  | 1   |
| 60 | F | R | 60 | Pre | 45.11 | 93  | 44.09 | 86  | 1   |
| 61 | F | R | 60 | Pre | 45.48 | 80  | 44.12 | 170 | 3   |
| 62 |   | L |    | Pre | 45.05 | 93  | 44.25 | 3   | 1   |
| 63 | F | R | 70 | Pre | 44.08 | 172 | 42.98 | 82  | 1   |
| 64 |   | L |    | Pre | 43.74 | 156 | 42.98 | 66  | 1   |
| 65 | M | R | 69 | Pre | 45.69 | 6   | 44.94 | 96  | 1   |
| 66 |   | L |    | Pre | 45.93 | 166 | 44.91 | 76  | 2   |
| 67 | F | R | 82 | Pre | 46.21 | 131 | 45.17 | 41  | 1   |
| 68 |   | L |    | Pre | 48.87 | 158 | 46.35 | 68  | 1   |
| 69 | M | R | 64 | Pre | 39.68 | 10  | 39.14 | 100 | 0   |
| 70 |   | L |    | Pre | 43.16 | 51  | 40.32 | 141 | 0   |
| 71 | M | R | 64 | Pre | 43.87 | 10  | 42.11 | 100 | 1   |
| 72 |   | L |    | Pre | 44.15 | 167 | 42.36 | 77  | 0   |
| 73 | F | R | 74 | Pre | 44.97 | 30  | 43.65 | 120 | 1   |
| 74 |   | L |    | Pre | 44.55 | 160 | 43.58 | 70  | 1   |
| 75 | M | R | 76 | Pre | 43.95 | 28  | 43.39 | 118 | 1   |
| 76 | M | R | 67 | Pre | 45.01 | 121 | 44.05 | 31  | 1   |
| 77 |   | L |    | Pre | 45.18 | 21  | 44.90 | 111 | 2   |
| 78 | F | R | 71 | Pre | 46.24 | 68  | 45.65 | 158 | 0   |
| 79 |   | L |    | Pre | 46.16 | 166 | 46.01 | 76  | 1.5 |
| 80 | F | R | 78 | Pre | 44.22 | 80  | 43.10 | 170 | 0   |
| 81 |   | L |    | Pre | 44.79 | 52  | 43.33 | 142 | 0   |
| 82 | M | R | 77 | Pre | 45.54 | 145 | 45.47 | 55  | 1   |
| 83 |   | L |    | Pre | 46.46 | 163 | 46.02 | 73  | 1.5 |
| 84 | F | R | 78 | Pre | 43.44 | 131 | 42.86 | 41  | 0.5 |
| 85 |   | L |    | Pre | 45.07 | 79  | 44.13 | 169 | 0   |

| CLP |     |     |     | Keratometric |         |     |         |     | MRD |
|-----|-----|-----|-----|--------------|---------|-----|---------|-----|-----|
| No  | sex | R/L | age | Ks           | Ks Axis | Kf  | Kf Axis |     |     |
| 1   | F   | R   | 54  | Pre          | 43.02   | 86  | 42.14   | 176 |     |
| 2   |     | L   |     | Pre          | 42.36   | 131 | 41.85   | 41  | 0.5 |
| 3   | F   | R   | 53  | Pre          | 45.09   | 107 | 43.93   | 17  | 0.5 |
| 4   | M   | R   | 33  | Pre          | 45.01   | 89  | 41.18   | 179 | 0   |
| 5   |     | L   |     | Pre          | 43.66   | 96  | 41.11   | 6   | 1   |
| 6   | F   | R   | 53  | Pre          | 47.72   | 96  | 45.46   | 6   | 1   |
| 7   |     | L   |     | Pre          | 47.49   | 87  | 44.60   | 177 | 0.5 |

|    |   |   |    |     |       |     |       |     |     |
|----|---|---|----|-----|-------|-----|-------|-----|-----|
| 8  | F | R | 50 | Pre | 43.00 | 79  | 41.51 | 169 | 0.5 |
| 9  |   | L |    | Pre | 42.43 | 113 | 41.73 | 23  | 1   |
| 10 | F | R | 48 | Pre | 45.29 | 86  | 42.61 | 176 | 1   |
| 11 |   | L |    | Pre | 44.76 | 93  | 42.39 | 3   | 1   |
| 12 | F | R | 44 | Pre | 45.08 | 86  | 43.52 | 176 | 1   |
| 13 | F | R | 50 | Pre | 46.62 | 98  | 45.69 | 8   | 1.5 |
| 14 |   | L |    | Pre | 51.80 | 35  | 46.89 | 125 | 1.5 |
| 15 | F | R | 57 | Pre | 43.53 | 108 | 41.56 | 18  | 1   |
| 16 |   | L |    | Pre | 43.59 | 82  | 41.22 | 172 | 1   |
| 17 | F | R | 40 | Pre | 42.84 | 107 | 41.41 | 17  | 0   |
| 18 |   | L |    | Pre | 43.44 | 86  | 41.24 | 176 | 0   |
| 19 | F | R | 44 | Pre | 45.77 | 69  | 44.73 | 159 | 1.5 |
| 20 |   | L |    | Pre | 46.32 | 94  | 44.72 | 4   | 0   |
| 21 | F | R | 53 | Pre | 44.68 | 96  | 43.77 | 6   | 0   |
| 22 |   | L |    | Pre | 44.91 | 93  | 44.27 | 3   | 0   |
| 23 | M | R | 41 | Pre | 41.99 | 10  | 41.74 | 100 | 1   |

|    | Keratometric |         |       |         |       |     | jafee     |          |
|----|--------------|---------|-------|---------|-------|-----|-----------|----------|
|    | Ks           | Ks Axis | Kf    | Kf Axis | Ave   | MRD | magnitude | axis     |
| 1M | 44.23        | 51      | 43.81 | 141     | 44.02 | 6   | 0.657884  | 14.43172 |
| 1M | 44.22        | 53      | 44.10 | 143     | 44.16 | 6   | 0.503276  | 2.290619 |
| 1M | 44.47        | 37      | 43.72 | 127     | 44.09 | 4   | 1.078859  | 40.90019 |
| 1M | 44.41        | 131     | 43.92 | 41      | 44.16 | 4   | 0.725601  | 103.5149 |
| 1M | 46.24        | 152     | 45.58 | 62      | 45.91 | 3   | 0.54531   | 112.6102 |
| 1M | 45.29        | 160     | 43.99 | 70      | 44.64 | 1   | 0.615256  | 7.366212 |
| 1M | 45.99        | 11      | 42.80 | 101     | 44.39 | 3   | 0.61      | 11       |
| 1M | 48.02        | 104     | 46.51 | 14      | 47.26 | 3.5 | 0.630694  | 112.9266 |
| 1M | 47.87        | 96      | 46.79 | 6       | 47.33 | 3.5 | 0.498     | 96       |
| 1M | 46.18        | 48      | 45.01 | 138     | 45.59 | 2.5 | 0.734052  | 176.2211 |
| 1M | 47.65        | 10      | 45.70 | 100     | 46.67 | 2.5 | 0.204744  | 49.29303 |
| 1M | 45.76        | 30      | 45.43 | 120     | 45.59 | 2.5 | 0.360824  | 53.78161 |
| 1M | 44.07        | 96      | 43.62 | 6       | 43.84 | 4   | 0.865416  | 83.9826  |
| 1M | 45.04        | 72      | 44.02 | 162     | 44.53 | 4   | 1.277447  | 99.93341 |
| 1M | 45.68        | 93      | 45.12 | 3       | 45.40 | 3.5 | 0.075027  | 70.36077 |
| 1M | 45.05        | 90      | 44.35 | 180     | 44.70 | 3   | 0.233521  | 149.758  |
| 1M | 44.49        | 121     | 44.05 | 31      | 44.27 | 2.5 | 2.804999  | 69.1814  |
| 1M | 44.35        | 25      | 43.50 | 115     | 43.92 | 2   | 0.940266  | 29.23718 |
| 1M | 43.34        | 86      | 42.74 | 176     | 43.04 | 2   | 0.588413  | 6.099502 |
| 1M | 43.55        | 124     | 42.28 | 34      | 42.91 | 1   | 0.218098  | 139.747  |
| 1M | 43.76        | 7       | 43.25 | 97      | 43.51 | 3   | 3.338453  | 115.3217 |
| 1M | 43.51        | 136     | 43.07 | 46      | 43.29 | 3   | 0.741651  | 115.5725 |
| 1M | 46.27        | 113     | 45.55 | 23      | 45.91 | 5   | 0.526711  | 42.06747 |
| 1M | 46.26        | 132     | 45.08 | 42      | 45.67 | 5   | 1.782392  | 126.6652 |
| 1M | 45.71        | 38      | 44.36 | 128     | 45.03 | 3   | 1.289922  | 65.49645 |
| 1M | 46.18        | 6       | 44.49 | 96      | 45.33 | 3.5 | 0.501391  | 138.1451 |
| 1M | 45.51        | 44      | 45.21 | 134     | 45.36 | 4   | 0.064533  | 81.56741 |
| 1M | 45.49        | 10      | 45.12 | 100     | 45.30 | 2   | 0.089517  | 151.683  |
| 1M | 45.16        | 17      | 44.91 | 7       | 45.04 | 3   | 1.013219  | 66.38761 |
| 1M | 46.36        | 62      | 45.35 | 152     | 45.86 | 2   | 1.238644  | 65.68065 |
| 1M | 44.77        | 127     | 43.88 | 37      | 44.33 | 3   | 0.561983  | 137.0149 |
| 1M | 44.65        | 163     | 43.56 | 73      | 44.10 | 3   | 0.43878   | 6.262853 |
| 1M | 51.19        | 87      | 47.48 | 177     | 49.33 | 2   | 2.400092  | 89.21158 |
| 1M | 47.98        | 145     | 47.76 | 55      | 47.87 | 2.5 | 1.016392  | 22.95738 |
| 1M | 46.07        | 107     | 45.84 | 17      | 45.95 | 2   | 0.59194   | 70.3661  |
| 1M | 45.99        | 42      | 44.47 | 132     | 45.23 | 0.5 | 1.593446  | 63.43803 |
| 1M | 46.67        | 1       | 42.51 | 91      | 44.59 | 2.5 | 2.594058  | 150.4321 |
| 1M | 43.60        | 174     | 42.26 | 84      | 42.93 | 2.5 | 0.556024  | 41.17801 |
| 1M | 44.66        | 80      | 43.35 | 170     | 44.01 | 4   | 0.557883  | 74.46263 |
| 1M | 44.33        | 120     | 43.77 | 30      | 44.05 | 4   | 0.474349  | 100.505  |
| 1M | 44.39        | 107     | 42.54 | 17      | 43.47 | 3   | 0.356811  | 120.4086 |
| 1M | 44.73        | 86      | 43.26 | 173     | 44.00 | 3   | 0.105891  | 121.7762 |
| 1M | 46.53        | 120     | 45.24 | 30      | 45.88 | 3.5 | 1.603967  | 99.37858 |
| 1M | 47.42        | 35      | 45.64 | 125     | 46.53 | 3.5 | 0.248075  | 142.1103 |
| 1M | 42.64        | 169     | 40.98 | 79      | 41.81 | 2   | 1.028894  | 128.2239 |
| 1M | 43.73        | 169     | 41.09 | 73      | 42.41 | 2   | 2.133855  | 130.6263 |
| 1M | 45.56        | 82      | 44.97 | 172     | 45.27 | 3.5 | 0.934082  | 89.10313 |
| 1M | 44.59        | 11      | 43.78 | 101     | 44.18 | 3.5 | 0.800817  | 8.530855 |

|    |       |     |       |     |       |     |          |          |
|----|-------|-----|-------|-----|-------|-----|----------|----------|
| 1M | 45.11 | 23  | 44.61 | 13  | 44.86 | 3   | 0.105691 | 56.80151 |
| 1M | 45.04 | 153 | 44.55 | 63  | 44.79 | 2   | 0.116755 | 41.13074 |
| 1M | 44.64 | 105 | 43.92 | 15  | 44.28 | 1   | 0.413028 | 119.6297 |
| 1M | 44.97 | 30  | 44.58 | 120 | 44.78 | 1   | 0.71486  | 22.9149  |
| 1M | 42.82 | 172 | 42.44 | 82  | 42.63 | 4.5 | 0.323417 | 179.0809 |
| 1M | 43.15 | 155 | 42.53 | 65  | 42.84 | 4.5 | 0.264959 | 89.23913 |
| 1M | 43.37 | 138 | 42.90 | 48  | 43.14 | 3   | 0.723792 | 87.91528 |
| 1M | 43.71 | 163 | 43.14 | 73  | 43.42 | 3   | 0.508782 | 132.5036 |
| 1M | 46.20 | 7   | 44.35 | 97  | 45.27 | 4   | 0.264279 | 123.5153 |
| 1M | 47.92 | 37  | 45.78 | 127 | 46.85 | 3   | 2.735669 | 58.35355 |
| 1M | 43.41 | 148 | 42.89 | 58  | 43.15 | 4.5 | 0.271932 | 109.4822 |
| 1M | 45.12 | 92  | 44.12 | 94  | 44.64 | 3   | 0.78552  | 88.5678  |
| 1M | 45.95 | 89  | 44.12 | 179 | 45.03 | 4   | 0.676027 | 108.3865 |
| 1M | 45.24 | 86  | 44.06 | 176 | 44.65 | 4   | 0.45679  | 73.4661  |
| 1M | 44.04 | 6   | 42.80 | 96  | 43.42 | 3.5 | 0.582167 | 37.25318 |
| 1M | 43.27 | 172 | 42.60 | 82  | 42.94 | 3.5 | 0.398888 | 34.55777 |
| 1M | 46.47 | 125 | 45.63 | 35  | 46.05 | 4   | 1.382443 | 111.3038 |
| 1M | 45.81 | 38  | 45.45 | 128 | 45.63 | 4.5 | 1.160891 | 67.24431 |
| 1M | 45.98 | 142 | 45.22 | 52  | 45.60 | 2.5 | 0.439895 | 20.83451 |
| 1M | 45.46 | 14  | 44.46 | 104 | 44.96 | 2   | 2.406856 | 56.3625  |
| 1M | 39.15 | 38  | 39.00 | 128 | 39.08 | 4   | 0.460066 | 91.62132 |
| 1M | 43.31 | 55  | 40.56 | 145 | 41.94 | 4   | 0.398705 | 103.7732 |
| 1M | 44.07 | 10  | 42.96 | 100 | 43.52 | 4.5 | 0.65     | 100      |
| 1M | 44.03 | 163 | 42.52 | 73  | 43.27 | 4.5 | 0.361951 | 94.74661 |
| 1M | 45.04 | 28  | 43.87 | 118 | 44.46 | 6   | 0.164889 | 134.9735 |
| 1M | 44.72 | 170 | 44.28 | 80  | 44.50 | 6   | 0.576523 | 62.43445 |
| 1M | 44.05 | 49  | 43.53 | 139 | 43.79 | 4   | 0.388835 | 86.25556 |
| 1M | 44.88 | 121 | 43.86 | 31  | 44.37 | 4.5 | 0.06     | 121      |
| 1M | 44.74 | 169 | 44.34 | 79  | 44.54 | 5   | 0.367096 | 147.3606 |
| 1M | 46.48 | 82  | 45.69 | 172 | 46.08 | 3   | 0.389059 | 104.2086 |
| 1M | 46.89 | 107 | 46.17 | 17  | 46.53 | 3   | 0.80144  | 102.244  |
| 1M | 44.26 | 83  | 43.16 | 173 | 43.71 | 2   | 0.11789  | 131.377  |
| 1M | 45.18 | 94  | 43.05 | 4   | 44.11 | 2   | 2.458297 | 112.2456 |
| 1M | 46.06 | 44  | 45.18 | 134 | 45.62 | 3.5 | 0.955263 | 44.7865  |
| 1M | 46.27 | 146 | 45.79 | 56  | 46.03 | 2   | 0.270321 | 114.5941 |
| 1M | 43.63 | 128 | 42.75 | 38  | 43.19 | 3.5 | 0.30918  | 122.3458 |
| 1M | 45.18 | 82  | 44.55 | 172 | 44.86 | 3.5 | 0.310791 | 162.7849 |

|    | Keratometric |         |       |         | Ave   | MRD | Jafee     |          |
|----|--------------|---------|-------|---------|-------|-----|-----------|----------|
|    | Ks           | Ks Axis | Kf    | Kf Axis |       |     | magnitude | axis     |
| 1M | 43.04        | 79      | 42.33 | 169     | 42.68 | 3.5 | 0.256941  | 16.97567 |
| 1M | 42.45        | 107     | 41.81 | 17      | 42.13 | 4   | 0.476463  | 80.65095 |
| 1M | 44.61        | 84      | 43.99 | 174     | 44.30 | 3.5 | 0.852753  | 33.05129 |
| 1M | 43.93        | 91      | 41.29 | 1       | 42.61 | 3   | 1.220405  | 174.6605 |
| 1M | 43.49        | 91      | 41.13 | 1       | 42.31 | 3   | 0.467925  | 36.57001 |
| 1M | 47.53        | 79      | 45.45 | 169     | 46.49 | 4   | 1.280516  | 38.63728 |
| 1M | 47.58        | 83      | 45.46 | 173     | 46.52 | 4   | 0.843891  | 7.232254 |

|    |       |     |       |     |       |     |          |          |
|----|-------|-----|-------|-----|-------|-----|----------|----------|
| 1M | 43.71 | 83  | 41.90 | 173 | 42.80 | 4   | 0.393563 | 98.89807 |
| 1M | 43.11 | 96  | 41.93 | 6   | 42.52 | 3.5 | 0.720619 | 79.28381 |
| 1M | 45.35 | 90  | 42.43 | 180 | 43.89 | 4.5 | 0.458166 | 117.2482 |
| 1M | 45.24 | 100 | 42.54 | 10  | 43.89 | 4.5 | 0.702959 | 127.1552 |
| 1M | 44.45 | 93  | 43.19 | 3   | 43.82 | 3.5 | 0.454723 | 154.9532 |
| 1M | 46.25 | 107 | 45.58 | 17  | 45.92 | 3   | 0.358599 | 170.3674 |
| 1M | 47.38 | 69  | 45.82 | 159 | 46.60 | 4   | 4.560432 | 115.6928 |
| 1M | 43.29 | 100 | 41.64 | 10  | 42.47 | 4   | 0.595179 | 42.9154  |
| 1M | 43.33 | 77  | 41.16 | 167 | 42.24 | 4   | 0.448357 | 20.59326 |
| 1M | 43.67 | 105 | 41.44 | 15  | 42.56 | 4.5 | 0.819468 | 101.5287 |
| 1M | 44.11 | 91  | 41.32 | 1   | 42.72 | 4.5 | 0.722656 | 106.9569 |
| 1M | 45.96 | 66  | 45.15 | 156 | 45.55 | 3.5 | 0.249258 | 168.9287 |
| 1M | 45.61 | 93  | 44.61 | 3   | 45.11 | 3   | 0.591639 | 5.690857 |
| 1M | 44.79 | 172 | 44.68 | 82  | 44.74 | 4.5 | 1.008447 | 4.53232  |
| 1M | 45.31 | 107 | 44.29 | 17  | 44.80 | 4.5 | 0.553554 | 123.4368 |
| 1M | 41.97 | 44  | 41.71 | 134 | 41.84 | 3.5 | 0.285309 | 71.16745 |

c r a v y

|           |
|-----------|
| -0.124389 |
| -0.408299 |
| 1.0718476 |
| 0.5599823 |
| 0.4124008 |
| -0.48824  |
| 0.7151861 |
| 0.3083262 |
| 0.4432167 |
| -0.403315 |
| 0.1193113 |
| 0.6999865 |
| 0.7258242 |
| -0.246726 |
| 0.0760278 |
| -0.236109 |
| 1.5725841 |
| 1.1688792 |
| -0.50901  |
| -0.030218 |
| -4.361895 |
| -0.57558  |
| -0.022275 |
| -0.800361 |
| 0.5170393 |
| -0.336719 |
| 0.0172378 |
| -0.020895 |
| 1.0292168 |
| 1.5849564 |
| -0.042037 |
| -0.372232 |
| 2.4169094 |
| -0.521255 |
| 0.3477183 |
| 0.8937412 |
| -0.497552 |
| -0.20107  |
| 0.6713085 |
| 0.3231609 |
| 0.1065804 |
| -0.013671 |
| 1.1722816 |
| -0.307917 |
| -3.31303  |
| -5.593344 |
| 0.2145725 |
| 0.8512207 |

|           |
|-----------|
| 0.0687401 |
| -0.015703 |
| 0.100829  |
| 0.2852625 |
| -0.294293 |
| 0.2265849 |
| 0.5826711 |
| -1.015593 |
| -0.278412 |
| 4.6523519 |
| 0.1864575 |
| 0.116764  |
| 0.2745746 |
| 0.5130766 |
| 2.2990269 |
| -0.190127 |
| -0.62046  |
| 1.2482633 |
| -0.233582 |
| 2.6047123 |
| -0.389394 |
| -0.150434 |
| -0.752996 |
| 0.3389211 |
| -0.207299 |
| 0.2228321 |
| -0.023755 |
| 0.0205278 |
| -0.670165 |
| 0.1372201 |
| 0.5872879 |
| -0.071614 |
| -0.087168 |
| 1.2756487 |
| 0.1559658 |
| 0.09445   |
| -0.379248 |

|           |
|-----------|
| Cravy     |
| -0.106812 |
| 0.367966  |
| -0.077761 |
| -1.312909 |
| 0.0489696 |
| 0.4272821 |
| -0.674729 |



|           |
|-----------|
| 0.2701621 |
| 0.6829528 |
| 0.059581  |
| -0.043122 |
| -0.47269  |
| -0.346683 |
| -4.809938 |
| 0.0735954 |
| -0.085543 |
| 0.6340632 |
| 0.3829537 |
| -0.274198 |
| -0.52892  |
| -0.903514 |
| 0.0782232 |
| 0.0780255 |
